# Supplementary material for: Multiomics Evaluation of Human Fat-Derived Mesenchymal Stem Cells on an Osteobiologic Nanocomposite
Source: PubMed Central journal article supplement (PMC7047255; doi:10.1089/biores.2020.0005), 2020-02-21
Supplement: Supp_Table1.pdf [file Supp_Table1.pdf]

| Function     | Gene    | Fold Relation | Function                   | Gene                             | Fold Relation |         |
|--------------|---------|---------------|----------------------------|----------------------------------|---------------|---------|
| Ossification | ACVR1   | 6.8474        | Cartilage Condensation     | BMPR1B                           | 8.8697        |         |
|              | BGLAP   | 10.0949       |                            | COL2A1                           | 99.1968       |         |
|              | BMP2    | 1508.4894     |                            | SOX9                             | 63.509        |         |
|              | BMP3    | 80.3869       | Osteoclast Differentiation | BGLAP                            | 10.0949       |         |
|              | BMP4    | 11.7579       |                            | TNF                              | 49.0287       |         |
|              | BMP6    | 4.0527        |                            | TNFSF11                          | 118.7861      |         |
|              | BMPR1A  | 4.476         | Osteoblast Differentiation | ACVR1                            | 6.8474        |         |
|              | BMPR1B  | 8.8697        |                            | BGLAP                            | 10.0949       |         |
|              | BMPR2   | 2.1222        |                            | BMP2                             | 1508.4894     |         |
|              | CHRD    | 101.2812      |                            | BMP4                             | 11.7579       |         |
|              | COL2A1  | 99.1968       |                            | BMP6                             | 4.0527        |         |
|              | EGFR    | 2.9599        |                            | BMPR1A                           | 4.476         |         |
|              | FGF2    | 4.7422        |                            | BMPR1B                           | 8.8697        |         |
|              | FGFR2   | 4.8643        |                            | BMPR2                            | 2.1222        |         |
|              | GDF10   | 4.0247        |                            | CHRD                             | 101.2812      |         |
|              | GLI1    | 20.0967       |                            | FGF2                             | 4.7422        |         |
|              | IGF1R   | 5.3848        |                            | FGFR2                            | 4.8643        |         |
|              | MMP2    | 31.3898       |                            | GDF10                            | 4.0247        |         |
|              | MMP8    | 24.7992       |                            | GLI1                             | 20.0967       |         |
|              | MMP9    | 131.8014      |                            | NOG                              | 3.2465        |         |
|              | NOG     | 3.2465        |                            | SMAD1                            | 2.7363        |         |
|              | SMAD1   | 2.7363        |                            | SMAD3                            | 11.2789       |         |
|              | SMAD3   | 11.2789       |                            | SP7                              | 91.7025       |         |
|              | SOX9    | 63.509        |                            | SPP1                             | 18.8813       |         |
|              | SP7     | 91.7025       |                            | TWIST1                           | 5.4474        |         |
|              | SPP1    | 18.8813       |                            | Other Skeletal Development Genes | ALPL          | 3.3688  |
|              | TGFB1   | 13.6632       |                            |                                  | FGFR1         | 14.8826 |
|              | TGFB2   | 2.1819        |                            |                                  | TGFBR1        | 5.8383  |
|              | TNFSF11 | 118.7861      |                            |                                  |               |         |
|              | TWIST1  | 5.4474        |                            |                                  |               |         |
