# Supplementary material for: Multiomics Evaluation of Human Fat-Derived Mesenchymal Stem Cells on an Osteobiologic Nanocomposite
Source: PubMed Central journal article supplement (PMC7047255; doi:10.1089/biores.2020.0005), 2020-02-21
Supplement: Supp_Table2.pdf [file Supp_Table2.pdf]

| Function                          | Gene   | Fold Relation |
|-----------------------------------|--------|---------------|
| Bone Mineralization               | ACVR1  | 6.8474        |
|                                   | BGLAP  | 10.0949       |
|                                   | BMP2   | 1508.4894     |
|                                   | BMP4   | 11.7579       |
|                                   | BMP6   | 4.0527        |
|                                   | BMPR1A | 4.476         |
|                                   | BMPR1B | 8.8697        |
|                                   | BMPR2  | 2.1222        |
|                                   | FGFR2  | 4.8643        |
|                                   | SMAD3  | 11.2789       |
|                                   | SOX9   | 63.509        |
|                                   | TGFB1  | 13.6632       |
|                                   | TWIST1 | 5.4474        |
| Calcium Ion Binding & Homeostasis | BGLAP  | 10.0949       |
|                                   | CALCR  | 12.8073       |
|                                   | EGF    | 37.0711       |
|                                   | FGF2   | 4.7422        |
|                                   | MMP2   | 31.3898       |
|                                   | MMP8   | 24.7992       |
|                                   | TGFB1  | 13.6632       |
|                                   | VDR    | 2.0217        |
