# Supplementary material for: Multiomics Evaluation of Human Fat-Derived Mesenchymal Stem Cells on an Osteobiologic Nanocomposite
Source: PubMed Central journal article supplement (PMC7047255; doi:10.1089/biores.2020.0005), 2020-02-21
Supplement: Supp_Table3.pdf [file Supp_Table3.pdf]

| Function                      | Gene    | Fold Relation |
|-------------------------------|---------|---------------|
| Cell-Cell Adhesion            | BMPR1B  | 8.8697        |
|                               | COL14A1 | 5.4348        |
|                               | COL2A1  | 99.1968       |
|                               | EGFR    | 2.9599        |
|                               | ICAM1   | 4.4042        |
|                               | SOX9    | 63.509        |
|                               | TGFB1   | 13.6632       |
|                               | TNF     | 49.0287       |
|                               | TNFSF11 | 118.7861      |
| Cell-ECM Adhesion             | CD36    | 3.8519        |
|                               | COL2A1  | 99.1968       |
|                               | ITGA2   | 42.0944       |
|                               | ITGAM   | 29.4233       |
|                               | SMAD3   | 11.2789       |
| Other Cell Adhesion Molecules | BGLAP   | 10.0949       |
|                               | COL15A1 | 6.2285        |
|                               | TNF     | 49.0287       |
