# Supplementary material for: Multiomics Evaluation of Human Fat-Derived Mesenchymal Stem Cells on an Osteobiologic Nanocomposite
Source: PubMed Central journal article supplement (PMC7047255; doi:10.1089/biores.2020.0005), 2020-02-21
Supplement: Supp_Table4.pdf [file Supp_Table4.pdf]

| Function           | Gene              | Fold Relation | Function       | Gene            | Fold Relation |          |
|--------------------|-------------------|---------------|----------------|-----------------|---------------|----------|
| Hedgehog Signaling | BCL2              | 42.7478       | TGFβ Signaling | IFRD1           | 4.8605        |          |
|                    | BMP2              | 802.1775      |                | MYC             | 4.9398        |          |
|                    | BMP4              | 6.267         |                | WNT Signaling   | FOSL1         | 7.0508   |
|                    | PTCH1             | 23.3353       | CCND2          |                 | 2.2519        |          |
|                    | WNT1              | 178.2524      | MMP7           |                 | 3.1335        |          |
|                    | WNT2B             | 2.709         | MYC            |                 | 4.9398        |          |
|                    | WNT3A             | 127.508       | NFκB           |                 | BCL2A1        | 137.9286 |
|                    | WNT5A             | 2.3205        |                |                 | BIRC3         | 3.6921   |
|                    | WNT6              | 254.4276      |                | CCL5            | 8.9039        |          |
| Oxidative Stress   | FTH1              | 5.3435        |                | ICAM1           | 2.1452        |          |
|                    | GCLC              | 2.5867        |                | IFNG            | 119.5202      |          |
|                    | GCLM              | 16.3866       |                | TNF             | 68.9643       |          |
|                    | GSR               | 3.1191        |                | Notch Signaling | HES1          | 4.0309   |
|                    | HMOX1             | 778.4413      |                |                 | HES5          | 149.8918 |
|                    | SQSTM1            | 47.6513       |                |                 | HEY1          | 8.3462   |
|                    | TXN               | 2.3583        | HEY2           |                 | 63.9015       |          |
|                    | TXNRD1            | 4.4417        | HEYL           |                 | 78.672        |          |
|                    | Hypoxia Signaling | CA9           | 39.6096        |                 | LFNG          | 13.7794  |
| EPO                |                   | 76.8751       | NOTCH1         | 12.1631         |               |          |
| HMOX1              |                   | 778.4413      |                |                 |               |          |
| SLC2A1             |                   | 2.1852        |                |                 |               |          |
| VEGFA              |                   | 2.1452        |                |                 |               |          |
