# Supplementary material for: Multiomics Evaluation of Human Fat-Derived Mesenchymal Stem Cells on an Osteobiologic Nanocomposite
Source: PubMed Central journal article supplement (PMC7047255; doi:10.1089/biores.2020.0005), 2020-02-21
Supplement: Supp_Table5.pdf [file Supp_Table5.pdf]

| Pathway Name                                            | Overlapping Genes                                                                                                                                | Overlapping Metabolites                                                                                         |
|---------------------------------------------------------|--------------------------------------------------------------------------------------------------------------------------------------------------|-----------------------------------------------------------------------------------------------------------------|
| Signal Transduction                                     | TGFB1; BMP2; FLT1; BMPR2; IGF1R; NOG; EGF; CALCR; PDGFA; EGFR; SPP1; NFKB1; ITGA2; MMP9; BMPR1A; SMAD1; SMAD2; SMAD3; SMAD4; SMAD5; VEGFA; VEGFB | N-Acetylglucosamine; UDP-N-acetylglucosamine; Dopamine; NAD+; Glutamate                                         |
| Signaling by Receptor Tyrosine Kinases                  | PDGFA; EGFR; EGF; SPP1; FLT1; VEGFA; IGF1R; ITGA2; MMP9; VEGFB                                                                                   | NAD+                                                                                                            |
| Signaling by TGF-beta family members                    | TGFB1; BMP2; SMAD2; BMPR1A; BMPR2; SMAD1; NOG; SMAD3; SMAD4; SMAD5                                                                               | NAD+                                                                                                            |
| Extracellular matrix organization                       | TGFB1; COL2A1; PDGFA; ITGAM; SPP1; BMP2; BMP4; ICAM1; ITGA2; MMP9                                                                                | Ascorbate                                                                                                       |
| Gene expression (Transcription)                         | TGFB1; EGFR; BMP2; SMAD3; SMAD1; SMAD3; BGLAP; SMAD4; SP7; VEGFA                                                                                 | Glutathione disulfide; Glutathione; Ascorbate; Glutamate; NAD+                                                  |
| Generic Transcription Pathway                           | TGFB1; EGFR; BMP2; SMAD3; SMAD1; SMAD3; BGLAP; SMAD4; SP7; VEGFA                                                                                 | Glutathione disulfide; Glutathione; Glutamate; NAD+                                                             |
| Metabolism of proteins                                  | TGFB1; SPP1; BMP4; SMAD3; SMAD1; SMAD2; BGLAP; SMAD4; ALPL                                                                                       | Glucose 1-phosphate; Asparagine; Valine; Glutamate; NAD+; Inosine; N-Acetylglucosamine; UDP-N-acetylglucosamine |
| Post-translational protein modification                 | TGFB1; SPP1; BMP4; SMAD3; SMAD1; SMAD2; BGLAP; SMAD4; ALPL                                                                                       | N-Acetylglucosamine; UDP-N-acetylglucosamine; Glucose 1-phosphate; NAD+; Glutamate                              |
| Differentiation Pathway                                 | TGFB1; PDGFA; BMP4; EGF; TNFSF11; NOG; VEGFA                                                                                                     | Ascorbate                                                                                                       |
| HIF-1 signaling pathway - Homo sapiens (human)          | EGFR; FLT1; EGF; NFKB1; IGF1R; VEGFA                                                                                                             | Ascorbate                                                                                                       |
| Developmental Biology                                   | SMAD3; ITGA2; SMAD4; EGFR; SMAD2                                                                                                                 | Glutamate                                                                                                       |
| MAPK family signaling cascades                          | PDGFA; EGFR; EGF                                                                                                                                 | Glutamate                                                                                                       |
| MAPK1/MAPK3 signaling                                   | PDGFA; EGFR; EGF                                                                                                                                 | Glutamate                                                                                                       |
| RAF/MAP kinase cascade                                  | PDGFA; EGFR; EGF                                                                                                                                 | Glutamate                                                                                                       |
| Vitamin B12 Metabolism                                  | NFKB1; ICAM1                                                                                                                                     | Ascorbate; NAD+; Creatinine                                                                                     |
| Signaling by NOTCH                                      | EGFR; EGF                                                                                                                                        | N-Acetylglucosamine; UDP-N-acetylglucosamine                                                                    |
| Collagen formation                                      | COL2A1; MMP9                                                                                                                                     | Ascorbate                                                                                                       |
| Signaling by GPCR                                       | EGFR; CALCR                                                                                                                                      | Dopamine; NAD+; Glutamate                                                                                       |
| GPCR downstream signalling                              | EGFR; CALCR                                                                                                                                      | Dopamine; Glutamate; NAD+                                                                                       |
| Cellular responses to external stimuli                  | NFKB1                                                                                                                                            | Glutathione disulfide; Glutathione; NAD+                                                                        |
| Cellular responses to stress                            | NFKB1                                                                                                                                            | Glutathione disulfide; Glutathione; NAD+                                                                        |
| cAMP signaling pathway - Homo sapiens (human)           | NFKB1                                                                                                                                            | Dopamine                                                                                                        |
| Collagen biosynthesis and modifying enzymes             | COL2A1                                                                                                                                           | Ascorbate                                                                                                       |
| Protein digestion and absorption - Homo sapiens (human) | COL2A1                                                                                                                                           | Asparagine; Valine; Glutamate                                                                                   |
