# Supplementary material for: Multiomics Evaluation of Human Fat-Derived Mesenchymal Stem Cells on an Osteobiologic Nanocomposite
Source: PubMed Central journal article supplement (PMC7047255; doi:10.1089/biores.2020.0005), 2020-02-21
Supplement: Supp_Table6.pdf [file Supp_Table6.pdf]

| Pathway                                                                | Overlapping Genes | p-value  | Benjamini |
|------------------------------------------------------------------------|-------------------|----------|-----------|
| TGF-beta Signaling Pathway                                             | 18                | 1.10E-17 | 1.60E-15  |
| Cellular Response to BMP Stimulus                                      | 11                | 2.80E-16 | 1.20E-13  |
| Positive Regulation of Pathway-restricted SMAD Protein Phosphorylation | 12                | 9.30E-16 | 2.70E-13  |
| BMP Signaling Pathway                                                  | 13                | 5.40E-15 | 1.10E-12  |
| Signaling Pathways Regulating Pluripotency of Stem Cells               | 18                | 9.10E-14 | 4.30E-12  |
| Positive Regulation of Bone Mineralization                             | 9                 | 9.50E-12 | 1.00E-09  |
| Positive Regulation of Osteoblast Differentiation                      | 10                | 2.60E-11 | 2.30E-09  |
| Extracellular Space                                                    | 41                | 2.80E-22 | 4.10E-20  |
| SMAD Protein Signal Transduction                                       | 12                | 2.00E-11 | 2.80E-12  |
| Negative Regulation of Canonical Wnt Signaling Pathway                 | 5                 | 1.10E-02 | 9.70E-02  |
| Growth Factor                                                          | 14                | 1.40E-14 | 7.50E-13  |
| Osteogenesis                                                           | 5                 | 1.90E-05 | 2.20E-04  |
| Positive Regulation of Ossification                                    | 4                 | 3.10E-05 | 6.20E-04  |
| Osteoclast Differentiation                                             | 10                | 1.20E-05 | 1.20E-04  |
| FoxO Signaling Pathway                                                 | 10                | 1.50E-05 | 1.30E-04  |
| Adherens Junction                                                      | 7                 | 1.20E-04 | 7.20E-04  |
| Cell-cell Junction Organization                                        | 3                 | 4.00E-03 | 4.10E-02  |
| Angiogenesis                                                           | 11                | 2.80E-07 | 9.00E-06  |
